# Supplementary material for: Intestinal microbiome dysbiosis increases Mycobacteria pulmonary colonization in mice by regulating the Nos2-associated pathways
Source: eLife. 2024 Oct 16;13:RP99282. doi: 10.7554/eLife.99282 (PMC11483126; doi:10.7554/eLife.99282)
Supplement: Figure 1—source data 1. [file elife-99282-fig1-data1.xlsx]

## Sheet: Figure.1-source data
Figure 1b. Colonization of MS in the lung of mice
CON LOG10（CFU/g）	CL LOG10（CFU/g）
1.86012	5.06669
3.47704	3.64026
2.717	4
3.18248	4.67031
4.34846	6.05359
4.40871	5.46039
3.51036	3.76764
3.76592	4.15172
Figure 1c. The length of caecum
CON（cm）	CL（cm）
2.25	2.175
2.15	2.87
1.8	2.6
1.95	2.9
1.9	2.48
2.45	2.85
2.275	2.6
2.3	1.67
Figure 1d. Concentration of iFABP
CON（pg/mL)	CL（pg/mL)
534.523	663.841
438.98	829.672
527.829	772.163
589.293	603.594
365.953	662.319
610.288	766.687
502.878	612.418
548.824	734.129
Figure 1e. Concentration of LPS
CON（pg/mL)	CL（pg/mL)
549.366	638.249
366.921	549.95
394.113	694.385
528.899	660.177
332.713	535.916
541.471	548.489
405.223	760.171
563.107	697.602
