# Supplementary material for: Intestinal microbiome dysbiosis increases Mycobacteria pulmonary colonization in mice by regulating the Nos2-associated pathways
Source: eLife. 2024 Oct 16;13:RP99282. doi: 10.7554/eLife.99282 (PMC11483126; doi:10.7554/eLife.99282)
Supplement: Figure 2—source data 1. [file elife-99282-fig2-data1.xlsx]

## Sheet: Figure.2-source data
Figure 2a. alpha diversity index of gut microbiome
Figure 2a-left -chao1 index
	CON								CL
bacteria	70	80	57	64	76	69.3333	63	81	40	35	32	31	39	35	37	33
fungi	12	16	13	12	12	12	11	14	23	17	32	16	15	16	18	15
Figure 2a-right-inverse simpson index
	CON								CL
bacteria	9.66464	5.35065	7.37452	7.61766	9.92595	8.94398	7.25137	7.78598	5.21167	6.61673	5.96442	7.0616	4.41735	5.75126	5.67627
fungi	3.09372	3.74464	7.12352	3.55568	3.41899	2.6248	4.53243	4.04775	7.78847	9.55712	5.5322	6.96748	6.32475	3.16118	8.2496
