# Supplementary material for: Intestinal microbiome dysbiosis increases Mycobacteria pulmonary colonization in mice by regulating the Nos2-associated pathways
Source: eLife. 2024 Oct 16;13:RP99282. doi: 10.7554/eLife.99282 (PMC11483126; doi:10.7554/eLife.99282)
Supplement: Figure 3—source data 1. [file elife-99282-fig3-data1.xlsx]

## Sheet: Figure.3-source data
Figure 3a. ITS2/16S(Sobs)
CON	CL
0.171429	0.589744
0.2	0.485714
0.22807	1
0.1875	0.516129
0.157895	0.384615
0.173913	0.457143
0.177419	0.486486
0.17284	0.454545
Figure 3b. Firmicutes/Bacteroidota
CON	CL
0.570827	2.4725
0.577508	7.32656
0.733094	3.14154
0.395797	1.30186
0.587275	1.13055
1.05287	1.41744
0.683942	1.2117
0.556344	1.59139
Figure 3c. Ascomycota/Basidiomycota
CON	CL
59.4045	9.33636
9.45025	5.30728
8.83848	4.02165
77.2316	7.11096
21.1987	9.0327
55.1023	10.3495
12.0255	2.61815
4.79518
