# Supplementary material for: Intestinal microbiome dysbiosis increases Mycobacteria pulmonary colonization in mice by regulating the Nos2-associated pathways
Source: eLife. 2024 Oct 16;13:RP99282. doi: 10.7554/eLife.99282 (PMC11483126; doi:10.7554/eLife.99282)
Supplement: Figure 4—figure supplement 1—source data 1. [file elife-99282-fig4-figsupp1-data1.xlsx]

## Sheet: Figure 4-supplement-source data
Figure 4-supplement 1a. The chao1 index of gut microbiome
	FMT-CON						FMT-CL
bacteria	694.786	550.757	725.045	675.47	508.14	548.247	462.8	569.209	493	480.154	452
fungi	123.333	123	127	107	108	112.314	158.167	181	142.625	133	142.258
Figure 4-supplement 1b. The Inverse Simpson index of gut microbiome
	FMT-CON						FMT-CL
bacteria	25.2061	16.8158	22.202	16.5549	25.4026	34.9663	20.0545	20.7391	28.547	17.6947	17.0279	18.6968
fungi	22.5322	16.107	16.2747	31.9867	4.2912	12.3251	25.0225	5.49665	14.9466	5.25818	7.7238	16.0046
Figure 4-supplement 2a. The length of caecum
FMT-CON（cm)	FMT-CL(cm)
2.225	2.41667
2.71667	2.125
2.05	2.325
2.35	2.2
2.28333	2.3
2.25	2.51667
1.95	2.2
2.55	1.85
2.25	2.15
2.45	2.75
2.425	2.4
Figure 4-supplement 2b. The concentration of iFABP and LPS
	FMT-CON(pg/mL）										FMT-CL(pg/mL）
iFABP	550.954	638.586	491.62	435.024	572.253	469.712	371.126	489.794	368.083	454.498	915.783	853.406	738.084	759.688	729.869	927.345	962.641	816.284	976.942
LPS	367.214	554.628	303.183	440.016	321.603	436.215	399.96	486.212	569.54	492.644	830.342	814.846	859.58	671.58	717.191	881.508	799.057	879.461	716.314
