# Supplementary material for: Intestinal microbiome dysbiosis increases Mycobacteria pulmonary colonization in mice by regulating the Nos2-associated pathways
Source: eLife. 2024 Oct 16;13:RP99282. doi: 10.7554/eLife.99282 (PMC11483126; doi:10.7554/eLife.99282)
Supplement: Figure 4—source data 1. [file elife-99282-fig4-data1.xlsx]

## Sheet: Figure.4-source data
Figure 4c. ITS2/16S
FMT-CON	FMT-CL
0.228178	0.18872
0.226519	0.232353
0.161111	0.316254
0.19012	0.286013
0.21063	0.292035
0.149723
Figure 4d. Firmicutes/Bacteroidota
FMT-CON	FMT-CL
0.825955	0.31348
1.69968	0.385148
0.577463	0.360442
0.998643	0.143272
0.444182	0.433292
0.601843	0.529212
Figure 4e. Ascomycota/Basidiomycota
FMT-CON	FMT-CL
20.4435	37.7833
20.2853	5.10052
7.52216	20.7191
5.9331	6.61342
51.7582	31.6548
45.4542	20.7391
Figure 4h. Colonization of MS in the lung of mice
FMT-CON LOG10（CFU/g）	FMT-CL LOG10（CFU/g）
0	1.6066
2.33102	4.4542
0	3.62558
3.60716	2.3363
1.7217	4.66886
0	3.10887
3.31362	1.95494
3.57053	1.68215
0	5.20906
0	3.81682
0	2.42337
