# Supplementary material for: Intestinal microbiome dysbiosis increases Mycobacteria pulmonary colonization in mice by regulating the Nos2-associated pathways
Source: eLife. 2024 Oct 16;13:RP99282. doi: 10.7554/eLife.99282 (PMC11483126; doi:10.7554/eLife.99282)
Supplement: Figure 5—figure supplement 1—source data 1. [file elife-99282-fig5-figsupp1-data1.xlsx]

## Sheet: Figure 5-supplement-source data
Figure 5-supplement 2. RT-qPCR results of 8 genes in different groups
	CON			CL			CON-FMT			CL-FMT
Nos2	0.379559	0.451589	1.36237	24.3914	39.4975	30.842	0.619455	0.580952	0.410097	5.10725	5.426	6.99849
Cd14	67.033	57.3753	61.358	172.136	266.968	201.346	67.4584	56.6751	52.5836	161.748	142.398	140.173
Tnf	0.49322	0.418009	3.2784	35.4889	67.1039	9.48355	1.14993	0.990834	0.613645	9.24869	10.236	12.1725
Cd74	584.84	698.725	1012.79	2762.75	2823.03	1961.58	1184.12	974.184	791.091	1930.26	2095.36	2896.08
Clec4e	0.450687	0.669901	5.80563	96.4501	124.357	30.3616	1.86617	1.15545	0.973894	18.5694	22.314	34.8077
Ctsd	232.679	211.011	307.455	544.149	738.965	533.773	289.129	258.742	236.246	509.597	523.034	835.086
IL-6	0.071454	0.186333	1.80481	8.99052	7.49547	4.29915	0.355402	0.205064	0.116974	1.50908	1.82	2.33167
Cd209a	6.73916	10.2793	5.14896	2.88169	1.2151	3.67276	13.4718	8.688	12.268	3.5336	4.24012	2.6108
