# Supplementary material for: Intestinal microbiome dysbiosis increases Mycobacteria pulmonary colonization in mice by regulating the Nos2-associated pathways
Source: eLife. 2024 Oct 16;13:RP99282. doi: 10.7554/eLife.99282 (PMC11483126; doi:10.7554/eLife.99282)
Supplement: Figure 5—source data 1. [file elife-99282-fig5-data1.xlsx]

## Sheet: Figure.5-source data
Figure 5e. The results of RT-qPCR and RNA-seq
RT-qPCR
	CON			CL			FMT-CON			FMT-CL
Nos2	1.09997	1.09997	1.098	1.66077	1.69532	1.5438	1.24927	1.11682	0.716741	6.50701	4.06701	6.93755
cd74	1.18447	1.18447	0.852545	2.19299	2.76158	3.05192	0.960865	0.952383	1.09276	2.5248	3.26957	2.52664
ctsd	1.22809	0.854675	0.952727	2.7778	2.84306	2.17945	1.1084	1.11759	0.807273	1.48421	1.51411	1.78524
Tnf	1.14244	0.905275	0.96691	13.8171	15.2287	11.7379	1.00815	0.945598	1.04898	7.25289	7.41091	7.22955
RNA-seq
	CON			CL			FMT-CON			FMT-CL
Nos2	0.379559	0.451589	1.36237	24.3914	39.4975	34.2512	0.619455	0.580952	0.410097	5.10725	5.25452	6.99849
cd74	584.84	698.725	1012.79	2762.75	2823.03	1961.58	1184.12	974.184	791.091	1930.26	2365.07	2896.08
ctsd	232.679	211.011	307.455	544.149	738.965	533.773	289.129	258.742	236.246	509.597	652.326	835.086
Tnf	0.49322	0.418009	3.2784	35.4889	67.1039	9.48355	1.14993	0.990834	0.613645	9.24869	11.1458	12.1725
