# Supplementary material for: Intestinal microbiome dysbiosis increases Mycobacteria pulmonary colonization in mice by regulating the Nos2-associated pathways
Source: eLife. 2024 Oct 16;13:RP99282. doi: 10.7554/eLife.99282 (PMC11483126; doi:10.7554/eLife.99282)
Supplement: Figure 6—source data 1. [file elife-99282-fig6-data1.xlsx]

## Sheet: Figure.6-source data
Figure 6a. Nos2 relative expression
A549	A549+pcDNA3.1	A549+pcDNA3.1+Nos2
1.07592	2.09174	7674.6
0.917495	4.09841	7712.29
1.01302	4.10171	7523.73
Figure 6b. Colonization of MS in cells in different time
	A549（CFU/mL）						A549-pcDNA3.1（CFU/mL）						A549-pcDNA3.1-Nos2（CFU/mL）
6h	1980000	3100000	2490000	1550000	710000	970000	2220000	2370000	1990000	2030000	2010000		4270000	3400000	2980000	3900000	3180000	4120000
12h	240000	70000	230000	320000	1300000	780000	980000	1380000	820000	740000	1450000	880000	1350000	1240000	1850000	1390000	2440000	2420000
24h	1430000	1610000	2230000	2330000			1700000	2200000	1590000	1510000	2490000	2080000	30100000	24800000		22600000	34400000	22500000
Figure 6c. The concentration of NO
A549(μmol/L)	A549-pcDNA3.1(μmol/L)	A549-pcDNA3.1-Nos2 (μmol/L)
34.7339	17.9272	28.0112
22.9692	26.3305	44.8179
38.0952	29.6919	39.7759
31.3726	31.3726	39.7759
26.3305
26.3305
26.3305
Figure 6d. ROS fluorescence intensity
A549(%)	A549-pcDNA3.1(%)	A549-pcDNA3.1-Nos2(%)
0.673	1.017	0.119
0.749	0.904	0.138
0.968	0.641	0.04
0.769	0.691	0.006
Figure 6e. Defb1 relative expression
A549	A549+pcDNA3.1	A549+pcDNA3.1+Nos2
1.01805	1.04697	0.84008
1.02344	1.09508	0.865465
0.959771	1.04468	0.832702
